# Supplementary material
Source: ML conference proceedings conference paper supplement (https://proceedings.mlr.press/v180/he22a.html)
Supplement: Supplementary file [file he22a-supp.pdf]

# Reinforcement Learning in Many-Agent Settings Under Partial Observability: Supplementary File

Keyang He<sup>1</sup>

Prashant Doshi<sup>1</sup>

Bikramjit Banerjee<sup>2</sup>

<sup>1</sup> THINC Lab, Department of Computer Science, University of Georgia, Athens, GA, USA

<sup>2</sup> School of Computing Sciences and Engineering, University of Southern Mississippi, Hattiesburg, MS, USA

## 1 DYNAMIC PROGRAMMING ALGORITHM

---

**Algorithm 1** Computing configuration distribution  $Pr(\mathcal{C}|b_0(M_1), b_0(M_2), \dots, b_0(M_N))$

---

**Require:**  $\langle b_0(M_1), b_0(M_2), \dots, b_0(M_N) \rangle$

**Ensure:**  $P_N$ , which is the distribution  $Pr(\mathcal{C}^{\alpha-0})$  represented as a trie.

Initialize  $c_0^{a_i} \leftarrow (0, \dots, 0)$ ,  $P_0[c_0^{a_i}] \leftarrow 1.0$

**for**  $k = 1$  to  $N$  **do**

    Initialize  $P_k$  to be an empty trie

**for**  $c_{k-1}^{a_i}$  from  $P_{k-1}$  **do**

**for**  $a_k^{a_i} \in A_k^{a_i}$  such that  $\pi_k^{a_i}(a_k^{a_i}) > 0$  **do**

$c_k^{a_i} \leftarrow c_{k-1}^{a_i}$

**if**  $a_k^{a_i} \neq \emptyset$  **then**

$c_k^{a_i}(a_k^{a_i}) \leftarrow 1$

**end if**

**if**  $P_k[c_k^{a_i}]$  does not exist **then**

$P_k[c_k^{a_i}] \leftarrow 0$

**end if**

$P_k[c_k^{a_i}] \leftarrow P_{k-1}[c_{k-1}^{a_i}] \times \pi_k^{a_i}(a_k^{a_i})$

**end for**

**end for**

**end for**

**return**  $P_N$

---

## 2 PROOF OF PROPOSITION 1

Here we assume a common model of noise,  $P(a_j^o|a_k^e)$ , where the subject agent observes action  $a_j^o$  from another agent when the latter executed action  $a_k^e$ , as

$$P(a_j^o|a_k^e) = \begin{cases} 1 - \delta & \text{if } a_j^o = a_k^e \\ \frac{\delta}{|A|-1} & \text{otherwise} \end{cases} \quad (1)$$

for some small  $\delta$ . The effect of such noise from the private observation of an individual agent's action can be aggregated over  $N$  agents in terms of  $\delta$  as follows. Suppose the observed configuration,  $\omega'_0$ , is  $\mathcal{C}^o = (\#a_1^o, \#a_2^o, \dots, \#a_{|A|}^o)$ ,

and the true configuration is  $\mathcal{C}^e = (\#a_1^e, \#a_2^e, \dots, \#a_{|A|}^e)$ . Then the probability of an error in the observation of a configuration is

$$\begin{aligned} P(\text{error}) &= \sum_{\mathcal{C}^e} \sum_{\mathcal{C}^o \neq \mathcal{C}^e} P(\mathcal{C}^o \wedge \mathcal{C}^e) \\ &= \sum_{\mathcal{C}^e} \sum_{\mathcal{C}^o \neq \mathcal{C}^e} P(\mathcal{C}^o|\mathcal{C}^e)P(\mathcal{C}^e) \end{aligned}$$

where

$$P(\mathcal{C}^e) = \prod_i \theta_i^{\#a_i^e}, \text{ and}$$

$$P(\mathcal{C}^o|\mathcal{C}^e) = \prod_{(j,k) \in A \times A} P(a_j^o|a_k^e)^{n_{jk}}$$

$$\text{s.t. } \left( \sum_j n_{jk} = \#a_k^e \right) \wedge \left( \sum_k n_{jk} = \#a_j^o \right) \quad (2)$$

Let  $m_i^{o_e} = \min\{\#a_i^o, \#a_i^e\}$ . Then  $P(\mathcal{C}^o|\mathcal{C}^e)$  can be maximized by setting the diagonal of the matrix  $[n_{jk}]$  as  $n_{ii} = m_i^{o_e}$ , and distributing the remaining weight  $N - \sum_i m_i^{o_e}$  to the off-diagonal positions while satisfying Eq. 2. This yields

$$\begin{aligned} P(\mathcal{C}^o|\mathcal{C}^e) &\leq (1 - \delta)^{\sum_i m_i^{o_e}} \left( \frac{\delta}{|A| - 1} \right)^{N - \sum_i m_i^{o_e}} \\ &\leq (1 - \delta)^{N-1} \left( \frac{\delta}{|A| - 1} \right) \end{aligned}$$

in order to ensure that  $\mathcal{C}^o \neq \mathcal{C}^e$ . Furthermore, the number of solutions of Eq. 2 is  $\leq \prod_i (m_i^{o_e} + 1) = O(N^{|A|})$ . Hence

$$P(\text{error}) \leq N^{|A|} (1 - \delta)^{N-1} \left( \frac{\delta}{|A| - 1} \right)$$

The above is a decreasing function of  $N$  when  $N > \frac{|A|}{\log(1/(1-\delta))}$ .

## 3 POLICY VALUE WITH RESPECT TO EPISODES

We choose to use time in hours as metric for demonstrating efficiency of tested algorithms. We provide additional plots

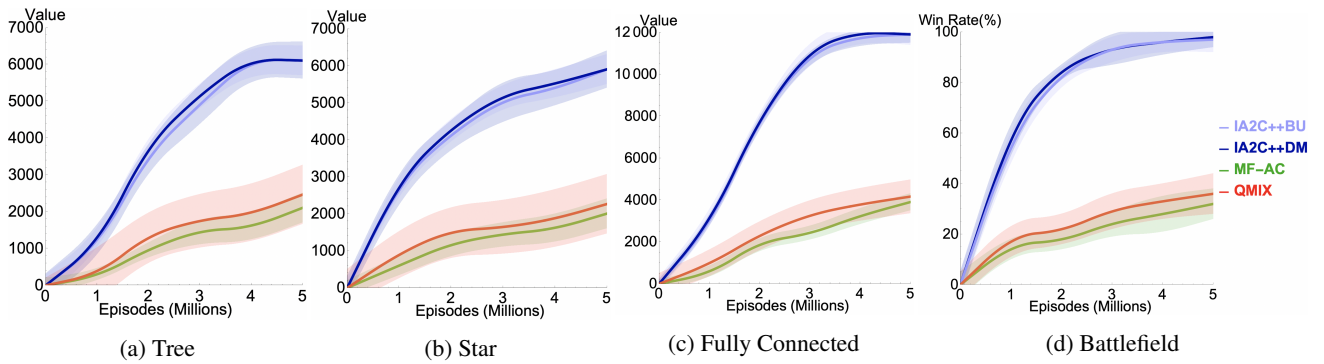

Figure 1: Cumulative reward of learned policies in (a) tree structure, (b) star structure, and (c) fully connected structure. (d) Win rate against pre-trained agents in the MAgent battlefield domain.

that use episodes as metric in Fig. 1. QMIX and MF-AC do not converge to optimal policy given same amount of episodes as IA2C-BU, however, it only takes QMIX and MF-AC about one third of the time to finish one episode compared to IA2C-BU.
